# Supplementary material for: Using intervention mapping to adapt a visual-aided adolescent nutrition intervention from peri-urban Burkina Faso and operationalize implementation strategies in rural Uganda
Source: Research Square preprint supplement (doi:10.21203/rs.3.rs-8417322/v1), 2026-01-06
Supplement: Supplementary file 1 [file 2ebd1c594e08133fd30b625c.docx]

**Supplementary material 5 (table): Implementation strategy operationalization matrix ‒ delivery schedule, theory-informed strategies, and participant roles.**

| **Thematic area and implementation period** | **SCT-based behavioral change methods and corresponding implementation strategies to be employed by CHWs during home visit** | **Participant roles (AYAs, parents, CHWs)** |
| --- | --- | --- |
| **Month I: Rich and balanced diet** |  |  |
| 1.1 Eat a balanced diet to nourish your body and mind. Take the first step toward better health today! | Modelling and encouragement: CHWs show examples of balanced meals using local foods. They encourage AYAs and parents to start adding different food types to their meals and praise small improvements made at home. | CHWs show and explain meals; AYAs listen and share what foods they eat; parents help prepare mixed meals and support AYAs to keep trying. |
| 1.2 A balanced diet is one with: proteins (beans, nuts, fish), vitamins, minerals and fiber (amaranth, cabbage, jackfruits, mangoes, oranges), and carbohydrates (potatoes, cassava, whole maize). | Guided practice: CHWs help families name local foods in each group and show how to mix them on one plate. They use pictures and local examples to make it easy to remember. | CHWs guide families in naming foods and mixing them; AYAs practise putting different foods together; parents share affordable foods they can buy or grow. |
| 1.3 Protein, vitamins and fiber are the pillars of a healthy meal. Take care of your body! | Storytelling and demonstration: CHWs tell short stories about how eating body-building and protective foods keeps people strong and less sick. They show local foods rich in these nutrients. | CHWs tell stories and show examples; AYAs say what foods they like; parents plan to include more protein and vegetables in family meals. |
| 1.4 Diversify your meal: half vegetables and fruits, a quarter protein, and a quarter carbohydrate. The more varied your meal is, the better your health! | Demonstration and follow-up: CHWs use local utensils or cups to show the right amount of each food group on a plate. AYAs and parents try the same at home and report what they managed to eat. | CHWs show correct food portions; AYAs try to make similar plates at home; parents help plan meals and keep encouraging variety. |
| **Month 2: Eating habits and hygiene** |  |  |
| 2.1 Good eating habits start when you are young but it is never too late to adopt healthy eating habits. | Modelling and encouragement: CHWs share short stories of community members who changed their diet and became stronger. They remind AYAs and parents that change can start at any age. | CHWs tell success stories and encourage families; AYAs share what changes they can make; parents support these new habits at home. |
| 2.2 Eat a healthy, balanced diet to be healthy in body and mind. | Guided practice: CHWs help AYAs and parents plan one daily meal that combines body-building, energy, and protective foods. | CHWs help families create a sample daily meal; AYAs plan and prepare meals; parents help buy or grow needed foods. |
| 2.3 Washing your hands before eating is a simple and very important step to stay healthy! | Demonstration and reinforcement: CHWs show the correct hand-washing steps with clean water and soap. They praise families who practise it before eating. | CHWs demonstrate hand-washing; AYAs practise it before meals; parents remind and provide soap and clean water. |
| 2.4 To preserve the taste of food and avoid germs, wash your food well and store it in a clean place. | Modelling and follow-up: CHWs show how to wash vegetables and cover cooked food. During home visits, they check storage and give feedback. | CHWs demonstrate washing and covering food; AYAs help with washing and storage; parents ensure food is kept clean and covered. |
| **Month 3: Consequences of poor diet** |  |  |
| 3.1 Avoid sugary drinks as much as possible because they can cause diseases like toothache, diabetes. | Self-monitoring and reinforcement: CHWs encourage AYAs to keep a weekly record of sugary drinks taken. Praise and positive feedback are given when intake is reduced. | AYAs track what they drink each day; parents limit sugary drinks at home; CHWs give praise and reminders during visits. |
| 3.2 Eating too much salt increases blood pressure, which strains the heart. Reduce your salt intake to protect your heart. | Guided practice: CHWs demonstrate measuring small salt amounts using bottle caps or spoons. AYAs and parents practise using less salt in cooking. | AYAs and parents practise at home; CHWs visit to observe and remind them to cook with less salt. |
| 3.3 Alcohol, tobacco and drugs can affect the development and functioning of your brain. Protect yourself and say NO to these dangerous products. | Modelling and persuasive Communication: CHWs share real-life stories of youth who avoided or quit these substances and succeeded. | AYAs listen and discuss; parents reinforce the message by discouraging substance use; CHWs act as positive role models. |
| 3.4 Too much fried and fatty meals lead to obesity, which can lead to diseases like diabetes and high blood pressure. Reduce your consumption of such foods to have a normal weight. | Guided practice and self-monitoring: CHWs demonstrate preparing food using less oil and steaming instead of frying. AYAs record how often they eat fried foods. | AYAs practise the new cooking methods; parents support by buying and preparing less oily foods; CHWs give follow-up advice. |
| **Month 4: Functions and food Sources of the main vitamins and minerals** |  |  |
| 4.1. Carrots, orange-fleshed sweet potatoes, and dodo help you have good eyesight because they contain vitamin A. | Modelling and guided practice: CHWs show real examples of these foods and explain how to prepare them without losing nutrients. | CHWs show and explain; AYAs and parents practise preparing and eating meals with these foods. |
| 4.2. Eat green leafy vegetables (dodo, nakkati, spinach, pumpkin leaves, bbuga). They are rich in iron and help your body make blood. | Guided practice: CHWs demonstrate how to cook these vegetables properly; parents and AYAs practise cooking them at home. | AYAs and parents cook together; CHWs visit homes to observe and encourage regular use. |
| 4.3. Oranges, mangoes, and jackfruit help your body fight diseases and stay strong. Eat these fruits often! | Persuasive communication and reinforcement: CHWs explain the benefits using pictures and local examples; repeat messages during follow-up visits. | AYAs listen and promise to eat fruits daily; parents provide fruits where possible. |
| 4.4. Your body needs vitamin D to stay healthy. Eat silverfish, eggs, mushrooms, and drink milk. | Modelling and reinforcement: CHWs show food samples or pictures and explain that vitamin D helps strengthen bones and teeth. | CHWs demonstrate; AYAs and parents identify which foods they can afford and plan to include. |
| **Month 5: Physical activity and lifestyle** |  |  |
| 5.1. Physical activity is not limited to sports. It is also walking, cleaning, gardening, brick making, fetching water, etc. | Modelling and guided practice: CHWs show examples of local daily tasks that count as physical activity and explain their health benefits. | CHWs demonstrate; AYAs and parents mention similar activities they do at home. |
| 5.2. Make physical activity part of your daily routine. Walk, run, play football/netball, do work around your home like sweeping, cleaning, etc. Your body will stay healthy. | Reinforcement and goal setting: CHWs encourage families to plan short daily physical activities and praise effort made. | AYAs set daily or weekly goals; parents remind and join them; CHWs provide support. |
| 5.3. Did you know that jumping is good for your bones? Find friends to do physical activity with, it's more fun. | Social support and modelling: CHWs promote group play and identify 'peer motivators' who encourage others to stay active. | AYAs form small groups for joint activities; parents support and allow time for play. |
| 5.4. Physical activity helps manage stress. Once you are active, you will be fitter than before. | Persuasive communication and Reinforcement: CHWs tell simple stories about how being active helps the body and mind, and praise small improvements. | CHWs encourage and give examples; AYAs share their experiences; parents appreciate and motivate continued effort. |
| **Month 6: Budgeting and meal planning** |  |  |
| 6.1. Buying cooked food outside your home may be convenient, but cooking your food at home enables you to prepare a healthy meal. | Modelling and persuasive communication: CHWs explain benefits of home-cooked meals and show examples of simple, healthy recipes made from local foods. | CHWs demonstrate; AYAs and parents discuss challenges and share ideas for cooking at home. |
| 6.2. No need to spend too much to eat a balanced diet: a little bean, rice/millet/maize, fresh vegetables and you have a balanced and delicious dish. | Guided practice and reinforcement: CHWs help families plan low-cost, balanced meals using available foods and praise families that practice this. | AYAs plan simple balanced meals; parents ensure availability of ingredients. |
| 6.3. Eat food from your garden if you can: tomatoes, onions, cabbage, orange-fleshed sweet potatoes, dodo; it is fresh, healthy and economical. | Modelling and social support: CHWs and parents encourage using home gardens; examples are shared from families already practicing. | CHWs promote small gardens; parents lead garden work; AYAs help with planting and harvesting. |
| 6.4. Plan your cooking in advance to avoid abrupt preparation or buying unhealthy meals. | Self-monitoring and guided practice: CHWs teach simple meal planning (weekly menus) and encourage families to track food use. | Parents and AYAs prepare plans together; CHWs check plans during visits and provide feedback. |
| **Month 7: Link between diet and mood** |  |  |
| 7.1. What you eat affects your mood. Foods rich in omega-3 and B vitamins, such as fish (tilapia, silver fish), avocado, and nuts (groundnuts, cashew) help you stay positive and focused. | Modelling and persuasive communication: CHWs show examples of local foods that lift mood and explain how eating them helps the brain and body feel better. | CHWs demonstrate and explain; AYAs and parents list locally available ‘feel-good’ foods they can eat more often. |
| 7.2. Skipping meals is a bad eating habit that may negatively affect your health, so eat at regular times. You will see that you will be in a good mood during the day. | Reinforcement and self-monitoring: CHWs encourage AYAs to eat at consistent times and note how they feel when they eat regularly. | AYAs try regular meals; parents remind and praise them; CHWs give feedback in follow-up visits. |
| 7.3. Eating salty or deep-fried foods like chips and sausages may feel tasty and quickly satisfy your hunger, but such foods although high in energy, they are not very nutritious. Eating them can also make you more irritable and tired. | Guided practice and persuasive Communication: CHWs guide families to replace fried or salty snacks with healthier local foods (roasted maize, fruits, boiled cassava). | CHWs demonstrate better options; AYAs and parents practise choosing healthier snacks. |
| 7.4. Dehydration can affect your mood and general health. Drink water regularly (at least 4 cups in total) throughout the day even when you are not thirsty. | Modelling and reinforcement: CHWs carry water bottles to demonstrate regular drinking; they praise those who practise the habit. | CHWs remind during visits; parents keep water available; AYAs commit to drinking water daily. |
| **Month 8: Choosing the right food from your garden or market** |  |  |
| 8.1. When you buy packed foods like cooking oil, mandazi, spices, etc., always check the expiration date to make sure the content is still safe to consume. | Guided practice and modelling: CHWs show how to locate expiry dates on packages and explain why expired foods are unsafe. | CHWs demonstrate checking labels; AYAs and parents practise identifying expiry dates on real products. |
| 8.2. If the ingredient list contains fats, sugars, and additives, it is often a sign that it is not very good for your health. Choose more natural products. | Persuasive communication and self-monitoring: CHWs discuss dangers of excess fats and sugars and encourage families to make healthier choices when shopping. | CHWs discuss and guide; AYAs and parents make a list of better food options for next market visit. |
| 8.3. Before buying packaged foods, read the label carefully. It gives you important information to know if what you are going to eat is good for your health. | Modelling and guided practice: CHWs demonstrate label reading using local examples and explain key words like ‘sugar,’ ‘fat,’ and ‘salt.’ | CHWs show labels; AYAs and parents practise reading and comparing different product labels. |
| 8.4. Prioritize your health over myths about beauty and physical attractiveness claims. Choose to eat natural foods. | Persuasive communication and reinforcement: CHWs use real stories and examples to correct myths and encourage self-confidence based on healthy habits. | CHWs guide and counsel; AYAs and parents discuss and commit to rejecting unhealthy myths. |
| **Month 9:** **Understanding and preventing anemia** |  |  |
| 9.1. The ingredient in food called iron plays a key role in the production of red blood cells, which carry oxygen throughout your body. It also helps prevent fatigue. | Persuasive communication and modelling: CHWs explain why iron is important and show examples of common iron-rich foods using local examples. | CHWs explain using pictures or real foods; AYAs and parents mention familiar iron-rich foods they already eat. |
| 9.2. Eat more iron-rich foods like millet, beans, and silver fish. | Guided practice and reinforcement: CHWs show how to include iron-rich foods in daily meals and praise families who try new recipes. | CHWs demonstrate meal combinations; AYAs and parents practise cooking or planning iron-rich meals at home. |
| 9.3. Iron is better absorbed by your body when combined with vitamin C. Foods rich in vitamin C include oranges, passion fruits, pineapples, mangoes, and fish. | Modelling and guided practice: CHWs demonstrate mixing foods rich in iron and vitamin C during cooking demonstrations. | CHWs demonstrate combinations; AYAs and parents try pairing iron- and vitamin C-rich foods. |
| 9.4. Did you know that tea and coffee can prevent your body from absorbing iron? Avoid drinking them right after meals to benefit from good iron absorption! | Persuasive communication and self-monitoring: CHWs teach when and how to drink tea or coffee and encourage families to observe how they feel after changing the habit. | CHWs explain using simple messages; AYAs and parents commit to avoiding tea or coffee immediately after meals. |
