# Supplementary material for: Using intervention mapping to adapt a visual-aided adolescent nutrition intervention from peri-urban Burkina Faso and operationalize implementation strategies in rural Uganda
Source: Research Square preprint supplement (doi:10.21203/rs.3.rs-8417322/v1), 2026-01-06
Supplement: Supplementary file 2 [file 5941e74bae5ea1b4cd349e75.docx]

## **Guides for co-design workshops to adapt a visual-aided nutrition intervention from peri-urban Burkina Faso and operationalize implementation strategies to rural Uganda**

**General information**

Sub-county…………………..Parish:……………………Village: ………………………..

Date: ……………………….. Name of note taker: …………………………………

Workshop number: ……………………Number of participants: …………………………….

Starting time:…………………….. End time: ………………………………………

**Instructions for the co-design coordinator**

Start by building rapport with participants. Introduce yourself and also request participants to introduce themselves.

- Brief participants about the objectives of each of the co-design workshops, how the process will be and the expected outputs.
- Seek written consent for the discussion from each prospective participant. Also discuss taking notes; seek oral consent for recording the discussion and taking photos/videos
- In collaboration with the participants, set and agree on ground rules
- One workshop per day, and each is expected to last about 4-5 hours with tea and lunch breaks
- Record number assigned to each member of the design group.
- Record the key characteristics of each member of the design group (age, village, education level, occupation
- Items in here should guide your discussion with the participants. The guide should not be followed word-for-word like a questionnaire. Be flexible and allow creativity.
- Questions you ask should be open-ended.
- Set up favorable conditions to ideate together? (adequate time, space, materials, mindset)
- Note that the workshops are **iterative rather than linear**; facilitators may move back and forth across topics as needed
- The co-esign coordinator must review these instructions prior to the start of each of the six workshops

**Additional coordinator guidance:**

- Encourage all participants to speak.
- Use simple language and examples.
- Probe why certain ideas are prioritized or rejected.
- Document all decisions and refinements transparently.

**Process note (applies to all co-design workshops):**

Throughout the co-design process, participatory techniques will be used: **free listing** (to surface ideas broadly), **pile sorting** (to cluster related ideas), and **consensus ranking** (to prioritize options by changeability, impact, and feasibility). These techniques support transparent adaptation of the Burkina Faso intervention and agreement on locally relevant **implementation strategies** for AYAs and households in rural Uganda.

**Workshop 1: Formulation of multi-stakeholder planning groups and assess community capacity**

**Objectives:**

- Identify and convene key stakeholders relevant to adolescent nutrition.
- Map community capacity and existing resources for intervention adaptation and implementation

**Facilitator probes:**

- “Who in this community already plays a role in adolescent health and nutrition?”
- “What existing resources or groups could support delivery of this intervention?”
- “Which delivery platforms or actors would be easiest to implement and sustain locally?”

**Participatory techniques:**

- **Free listing:** Identify community assets, key actors, and delivery platforms.
- **Pile sorting:** Cluster assets into personnel, institutional, and physical resources.
- **Consensus ranking:** Assess feasibility of CHW-led versus alternative delivery options.

**Workshop 2: Logical model of change ‒ Specify behavioural outcomes, environmental outcomes, performance outcomes and change objectives**

**Objectives:**

- Translate priority determinants into behavioural and environmental outcomes.
- Define performance objectives and change objectives.

**Facilitator probes:**

- “What specific changes in adolescent diet and lifestyle behaviours would have the most impact?”
- “Which of these outcomes can realistically be achieved in our communities?”
- “Why is this outcome more important or easier to influence than others?”

**Participatory techniques:**

- **Free listing:** Generate potential behavioural and environmental outcomes.
- **Pile sorting:** Group outcomes into behavioural and environmental domains.
- **Consensus ranking:** Prioritize outcomes by impact, feasibility, and fit with CHW home visits.

**Workshop 3: Logical model of the intervention (theory of change) ‒ theory-based methods and implementation strategies**

**Objectives:**

- Develop a logical model or theory of change.
- Select appropriate theory (SCT)-based behaviour change methods and corresponding implementation strategies.

**Facilitator probes:**

- “What strategies would work best to encourage AYAs to change their eating habits?”
- “How can CHWs or parents help model these behaviours at home?”
- “Which strategies are easiest to apply during routine household visits?”

**Participatory techniques:**

- **Free listing:** Identify SCT-informed methods and potential implementation strategies.
- **Pile sorting:** Group methods and strategies (e.g., modelling, guided practice, persuasion).
- **Consensus ranking:** Prioritize strategies by feasibility and expected behavioural impact.

**Workshop 4: Intervention production and operationalization tools**

**Objectives:**

- Translate selected methods and strategies into culturally tailored, visual-aided flyers.
- Localize language, imagery, sequencing and delivery cues.

**Facilitator probes:**

- “Which images or words are confusing or unclear?”
- “How can we make this message more understandable to everyone in the household?”
- “What should we change first to improve clarity and usability of the nutrition education flyer?”

**Participatory techniques:**

- **Free listing:** Identify clarity and usability issues raised during piloting.
- **Pile sorting:** Cluster issues (language, visuals, sequencing).
- **Consensus ranking:** Prioritize critical refinements.

**Workshop 5: Operationalization of implementation strategies**

**Objectives:**

- Define delivery workflows and CHW tasks.
- Co-develop standard operating procedures (SOPs) operationalizing prioritized implementation strategies and clarify roles.

**Facilitator probes:**

- “What exactly should CHWs do during a home visit?”
- “Which steps are easiest for CHWs to follow and remember?”
- “Where do you think problems might arise during delivery?”

**Participatory techniques:**

- **Free listing:** Enumerate CHW tasks and implementation strategy components per intervention theme.
- **Pile sorting:** Group tasks into delivery steps (opening, demonstration, reinforcement, follow-up).
- **Consensus ranking:** Select steps that are clearest, most feasible, and least burdensome.

**Workshop 6: Evaluation plan for intervention effectiveness and implementation strategies**

**Objectives:**

- Identify and prioritize intervention outcome and implementation outcome indicators.
- Align evaluation measures with theory of change and implementation strategies.

**Facilitator probes:**

- “How will we know this intervention is working?”
- “What signs or measures will show that change is happening?”
- “Which indicators are realistic for CHWs and local teams to measure?”

**Participatory techniques:**

- **Free listing:** Propose outcome and implementation process indicators and field constraints.
- **Pile sorting:** Cluster indicators into measurement, logistics, and ethics.
- **Consensus ranking:** Prioritize indicators by validity, feasibility, and fit with CHW workflows.
