# Supplementary material for: Using intervention mapping to adapt a visual-aided adolescent nutrition intervention from peri-urban Burkina Faso and operationalize implementation strategies in rural Uganda
Source: Research Square preprint supplement (doi:10.21203/rs.3.rs-8417322/v1), 2026-01-06
Supplement: Supplementary file 3 [file a4182655101b8a6f7c3ecd28.docx]

Supplementary material 1 (Table 1): Original nutrition and health education messages for Burkina Faso ‒ themes and content

| **Theme** | **Content message** |
| --- | --- |
| **Theme 1:** Nutritional needs of Adolescents | (i). Eat a balanced diet to nourish your body and mind. Take the first step toward better health today!  (ii). Protein vitamins and fiber are the pillars of a healthy diet. Take care of your body!  (iii). For a healthy plate: half vegetables, a quarter protein, and a quarter carbohydrate. Try this balanced formula!  (iv). Color your plate with a variety of vegetables. The more colorful and varied it is, the better it is for your health! |
| **Theme 2:** Eating habits and hygiene | (i).Good eating habits start when you're young. Your future self will thank you!  (ii). With local vegetables and seasonal fruits, prepare healthy; and less expensive meals!  (iii). Washing your hands before eating is a simple but very important step to stay healthy!  (iv). Wash your food well and store it healthily to preserve its taste and avoid germs! |
| **Theme 3:** Consequences of poor diet | (i). Soda is fine, but multiply by 7... Imagine Impact on your health in one week. Try a trick replace sugary drink with water with lemon and a little mint. It's refreshing and healthy. Make the right choices for your healthy  (ii). An unbalanced diet can harm your health. Take care of yourself at every meal  (iii). Don't let harmful substances control you. Be the master of your choices!  (iv). Eat a healthy, balanced diet to be healthy in body and mind. |
| **Theme 4:** Functions and food sources of the main vitamins | (i). Carrots and sweet potatoes help you have top vision thanks to vitamin A!  (ii). Eat green leaves (wild eggplant leaves, baobab leaves spinach), they are full of iron to give you strength and keep you healthy  (iii). Did you know that oranges boost your immunity? Eat one to stay in top shape!  (iv). Your body loves vitamin D. Get out in the sun or eat only fish (mackerel, sardines salmon) to get some |
| **Theme 5:** Physical activity and lifestyle | (i). Physical activity is not limited to sports. It is also walking, Dearing or gardening. Incorporate small daily habits to increase your physical activity!  (ii). Make exercise a game! Dance, run, play ball. Your body will thank you  (iii). Did you know that jumping is good for your bones? Find a rope, a friend or two and jump!  (iv). Physical activity helps manage stress and makes you feel less tired. Once you are active, you will have more energy than before. |
| **Theme 6:** Budgeting and Meal Planning | (i). With our local products like millet, sorghum and seasonal vegetables, prepare nutritious and economical meals for the whole family.  (ii). No need to break your budget to eat well: a little cowpea, fresh vegetables and you have a balanced and delicious dish.  (iii). Grow your own vegetable garden at home: moringa leaves, tomatoes or onions, it's fresh, healthy and economical  (iv). Plan your meals to avoid waste and eat better every day. |
| **Theme 7:** Link between diet and mood | (i). What you eat affects your mood. Foods rich in omega-3 and B vitamins, such as fish (catfish, mackerel, tuna), avocado, and nuts (cashew, peanut), help you stay positive and focused.  (ii). For a week, don't skip meals, eat them at regular times and focus on a balanced diet. You will quickly see the difference in your morale  (iii). Too much sugar and ultra-processed foods (candy, cookies. shawarma, hamburger, com-beef, etc.) can make you more irritable and tired. Eating better also means feeling better  (iv). Start drinking water regularly (at least 1.51) throughout the day today Dehydration can affect your mood and digestion |
| **Theme 8:** Managing emotions and eating habits | (i). Believing that sugary drinks (Fanta, Coca-Cola, Sprite, etc) and energy drinks (Triple X, Vody. Nescafé, etc.) give strength and well-being is an illusion  (ii). Stress and sadness can make you reach for alcohol or  energy drinks, but these drinks increase the risk of diseases such as diabetes, cancer or high blood pressure. Take care of your health, make healthier choices  (iii). Choose nutrient-rich foods (fruits and vegetables) to manage your emotions  (iv). The next time you feel stressed, try a physical or relaxing activity like walking, dancing cycling, listening to music |
| **Theme 9:** Understanding Anemia | (i). Iron plays a key role in the production of red blood cells, which carry oxygen throughout your body. It helps prevent fatigue  (ii). Iron is better absorbed by your body when combined with vitamin C. Foods ich in the vitamin are oranges, monkey bread detertum, jujube  (iii). Did you know that tea and coffee can prevent your body from absorbing iron? Avoid drinking them right after an iron-rich meal to enjoy good iron absorption!  (iv). Tired for no reason? it could be an iron deficiency. Eat more Iron-rich foods like baobab leaves, spinach, cowpeas or fish |
