# Supplementary material for: Using intervention mapping to adapt a visual-aided adolescent nutrition intervention from peri-urban Burkina Faso and operationalize implementation strategies in rural Uganda
Source: Research Square preprint supplement (doi:10.21203/rs.3.rs-8417322/v1), 2026-01-06
Supplement: Supplementary file 4 [file c7f088862f1d59bf32ead106.docx]

**Supplementary material 6**: **Illustrations of the original and adapted flyers for the remaining eight themes of the adolescent nutrition intervention**

**Original for Peri-Urban Burkina Faso**

**Adapted to Rural Uganda**


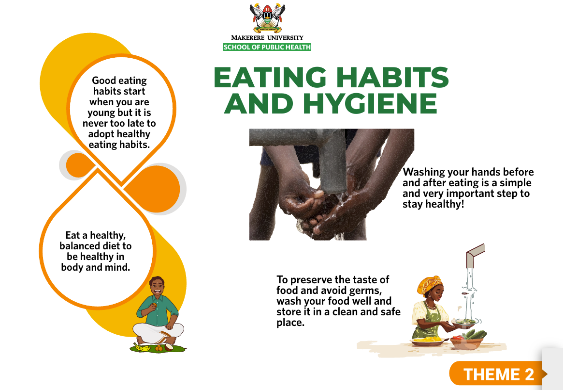

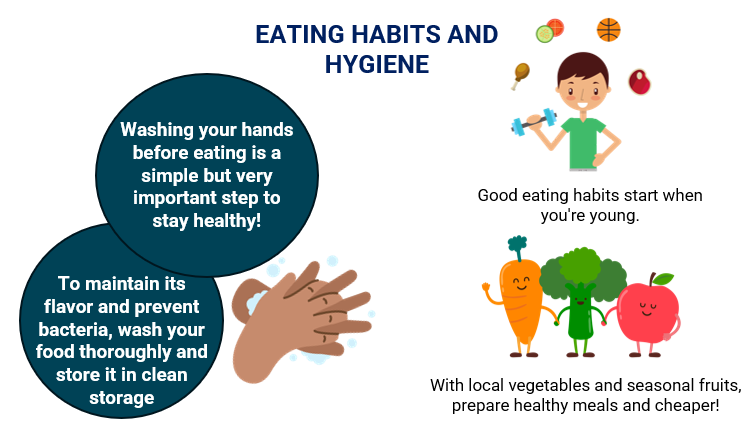

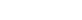

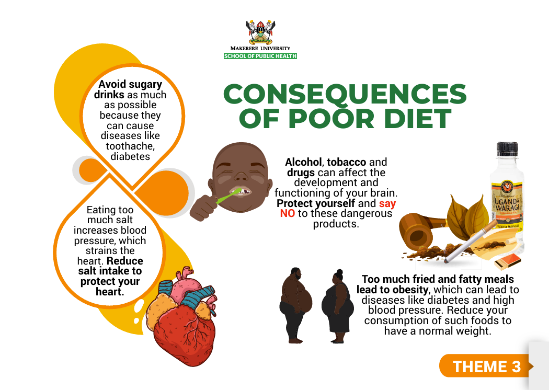

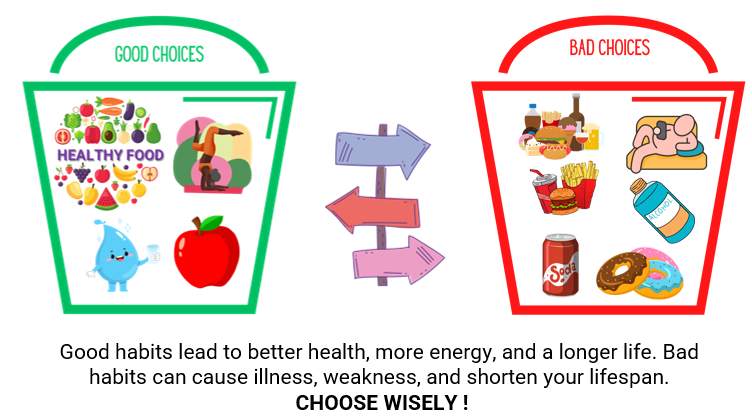

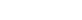

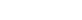

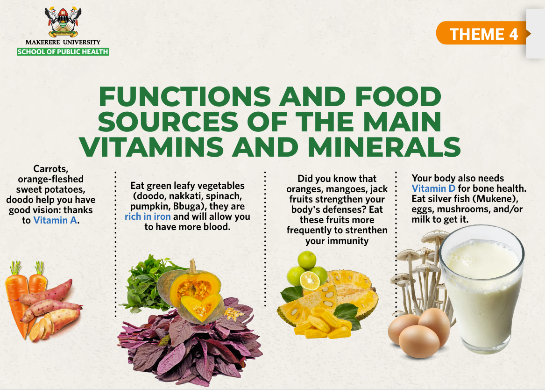

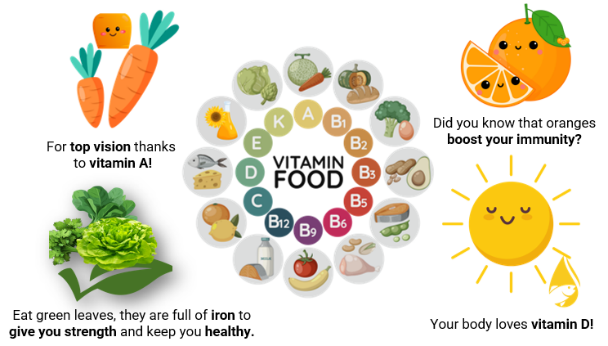

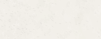


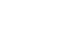


**Original for Urban Burkina Faso**

**Adapted to Rural Uganda**


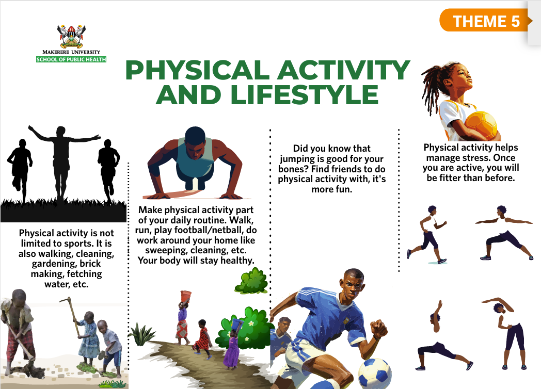

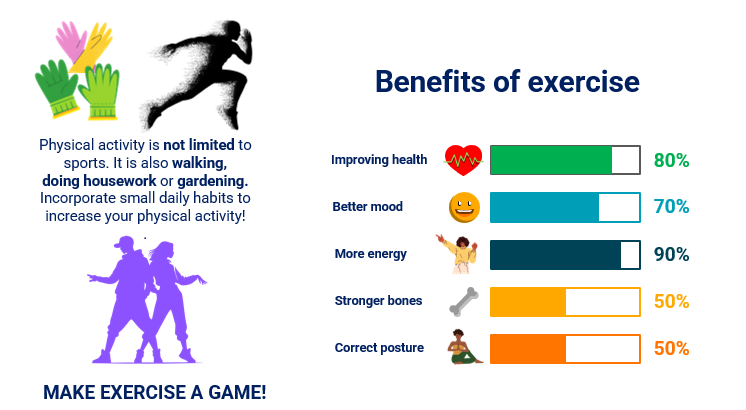

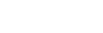

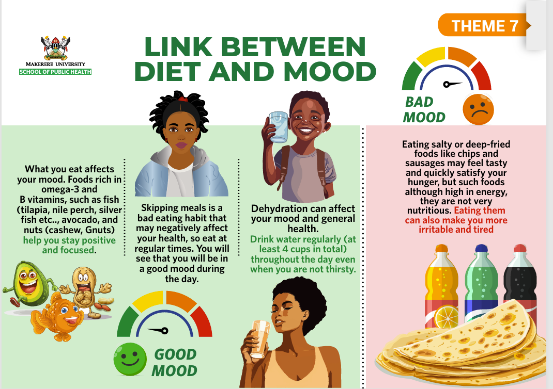

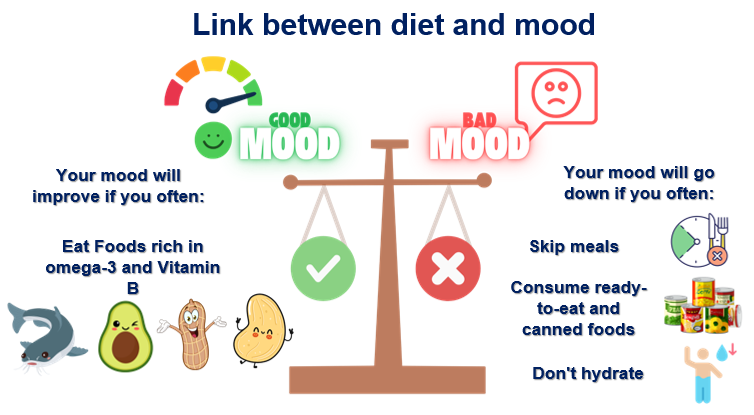

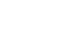

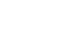

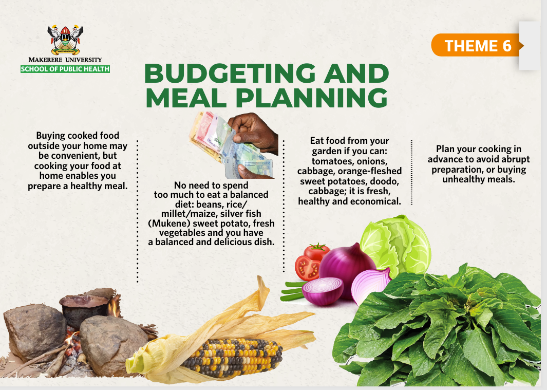

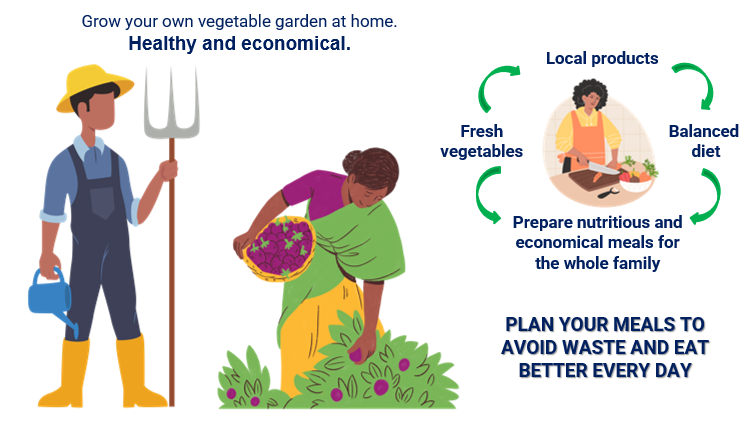

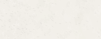

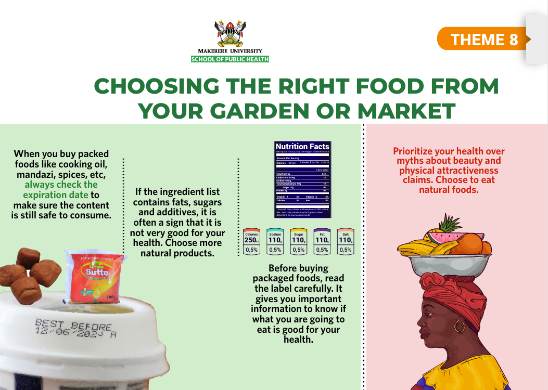

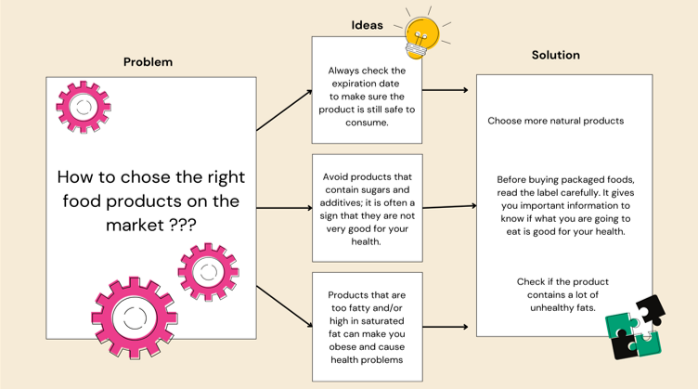

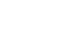

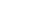

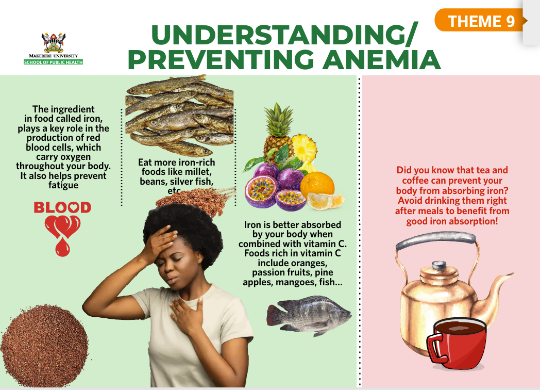

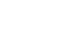

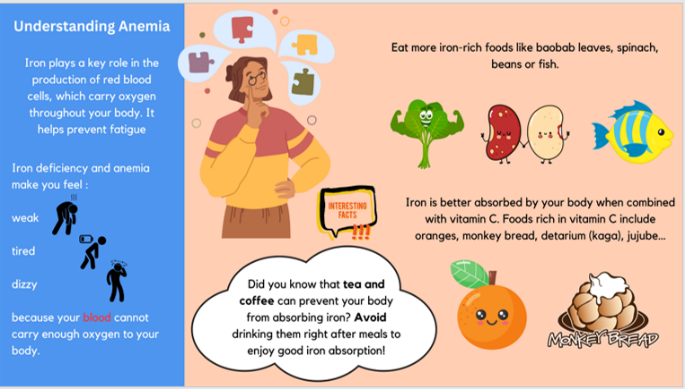


**Original for Peri-Urban Burkina Faso**

**Adapted to Rural Uganda**
