# Supplementary material for: Using intervention mapping to adapt a visual-aided adolescent nutrition intervention from peri-urban Burkina Faso and operationalize implementation strategies in rural Uganda
Source: Research Square preprint supplement (doi:10.21203/rs.3.rs-8417322/v1), 2026-01-06
Supplement: Supplementary file 5 [file e5e04867cd857ecadf72c60e.docx]

## ****Supplementary material 4: Standard operating procedures (SOPs) for operationalizing implementation strategies during CHW home visits****

**1. Introduction**

This SOP provides guidance for Community Health Workers (CHWs) conducting household visits to deliver the adapted visual-aided adolescent nutrition education intervention. It supports consistent **operationalization of implementation strategies**, ensuring quality, fidelity, and alignment with **Social Cognitive Theory (SCT)‒informed behavioral change methods**, including modelling, guided practice, reinforcement, and mobilization of social support.

**2. Purpose**

To ensure that CHWs deliver the adapted nutrition education sessions **consistently and as intended**, supporting implementation fidelity and effective use of intervention materials. These SOPs standardize **implementation strategies**, including session flow, use of visual tools, and interactive delivery approaches during each home visit.

**3. Scope**

These SOPs apply to all CHWs trained under this intervention and guide delivery to adolescents aged 10–24 years and their parents or guardians in Mayuge District, Uganda. Each session should last approximately 45–60 minutes and include structured interaction, demonstrations, and agreed follow-up actions.

**4. Materials required**

- CHW Training Guide booklet (English or *Lusoga* version)
- Thematic visual-aided flyers (Themes 1–9)
- Attendance sheet or digital register
- Demonstration items (local foods, utensils)
- Pen, notebook, and CHW identification card
- Monitoring and fidelity checklist

**5. Procedures for conducting home visits to deliver the intervention**

**Step 1: Preparation before the visit**

- Review the theme-specific objectives and key messages.
- Ensure all implementation materials (flyers, guide, visuals) are ready.
- Identify households with adolescents aged 10–24 years.
- Inform households in advance about the planned visit.

**Step 2: Introduction and rapport building**

- Greet the household respectfully and introduce yourself and the purpose of the visit.
- Explain the relevance of adolescent nutrition and the specific theme.
- Encourage participation from adolescents and parents/guardians.

**Step 3: Strategy-guided message delivery and engagement**

- Present the theme-specific flyer and read the key message aloud in *Lusoga* or English.
- **Modelling:** Demonstrate recommended practices (e.g., handwashing, balanced meal portions, food preparation) using local examples.
- **Guided practice:** Invite adolescents and parents to repeat demonstrations or practice identifying healthy foods available in the household.
- **Reinforcement:** Provide positive feedback, gently correcting misconceptions.
- **Mobilization of social support:** Encourage parents and siblings to support adolescents in applying new practices.
- Facilitate brief discussion to allow participants to share experiences and questions.

**Step 4: Review and reinforcement**

- Ask participants to summarize key messages.
- Reinforce learning using visual cues from the flyers.
- Agree on one or two feasible household actions to implement before the next visit.

**Step 5: Recording and follow-up**

- Complete the attendance and fidelity checklist after each session.
- Note households requiring additional support or follow-up.
- Confirm timing and topic for the next visit.

**6. Monitoring and supervision**

Supervisors will observe at least one session per CHW per month using a standardized checklist assessing **fidelity to implementation strategies,** correct use of visual tools, household engagement, and message accuracy. Feedback will be provided immediately after observation to reinforce effective delivery and address challenges.

**7. Documentation and reporting**

CHWs will maintain accurate records of all visits, including households reached, themes delivered, and observed responses. Monthly summaries will be submitted to the supervising health facility for review and feedback.

**8. Ethics and professional conduct**

- Obtain consent before initiating each session.
- Respect household privacy and confidentiality.
- Use respectful, inclusive language.
- Avoid political or religious discussions unrelated to nutrition and health education.
