# Supplementary material for: Using intervention mapping to adapt a visual-aided adolescent nutrition intervention from peri-urban Burkina Faso and operationalize implementation strategies in rural Uganda
Source: Research Square preprint supplement (doi:10.21203/rs.3.rs-8417322/v1), 2026-01-06
Supplement: Supplementary file 6 [file e87f43de656f94b833cd21c8.docx]

**Supplementary material 3: Completed Guidance for Reporting Intervention Development Studies (GUIDED)** **checklist**

| **GUIDED item** | **Description** | **Where addressed in manuscript** |
| --- | --- | --- |
| 1. Health problem and rationale | Description of the health problem and justification for intervention adaptation | Introduction (paragraphs 1–3) |
| 2. Target population and setting | Description of intended beneficiaries and delivery context | Introduction; Step I: Needs assessment and establishment of a multi-stakeholder planning group |
| 3. Existing evidence informing adaptation | Empirical, theoretical, and policy evidence informing the intervention | Introduction; Description of the original Burkina Faso intervention |
| 4. Theory underpinning adaptation | Intervention mapping (IM) protocol, Socioecological model (SEM), and Social Cognitive Theory (SCT) guided adaptation | Intervention adaptation and operationalization of implementation strategies: IM protocol, SEM, SCT described |
| 5. Systematic adaptation approach | Use of a structured framework to guide adaptation | Intervention adaptation and operationalization of implementation strategies; IM protocol overview |
| 6. Stakeholders involved | Identification of stakeholders and rationale for inclusion | Step I; Table 1 |
| 7. Stakeholder contributions and decision-making | How stakeholders contributed to adaptation decisions | Steps I–V; participatory techniques described |
| 8. Contextual influences | How contextual factors shaped adaptation | Step I (needs assessment); Discussion |
| 9. Description of the adapted intervention | Detailed description of intervention components | Steps III–IV; Table 3; Figures 3–4 |
| 10. Changes from the original intervention | What was retained, modified, or removed and why | Step IV: Intervention production; Table 3 |
| 11. Specification of implementation strategies | Explicit identification and description of strategies supporting delivery | Step III: Logical model of the intervention (theory of change) |
| 12. Operationalization of implementation strategies | Translation of strategies into actionable delivery tools | Step V: Operationalization of implementation strategies; Supplementary material 4 (delivery matrix); Supplementary material 5 standard operating procedures (SOPs) |
| 13. Mode of delivery and delivery agents | How the intervention is delivered and by whom | Step V; CHW-led monthly household visits |
| 14. Feasibility testing / piloting | Description of pilot testing of content and delivery | Step V: Piloting of content and implementation strategies; Table 4 |
| 15. Refinements following piloting | Modifications made based on pilot feedback | Step V; Table 4 |
| 16. Evaluation plan | Planned evaluation of intervention and implementation outcomes | Step VI: Evaluation plan for intervention effectiveness and implementation strategies; Table 5 |
| 17. Consideration of implementation fidelity | How fidelity is supported and assessed | Step V (SOPs); Step VI (Carroll’s fidelity model) |
| 18. Transferability and scalability | Consideration of wider applicability | Discussion; Implications for implementation practice |
| 19. Strengths and limitations of the adaptation process | Critical reflection on the process | Discussion: Strengths and limitations |
| 20. Transparency and replicability | Sufficient detail to allow replication | All IM steps (I–VI); Supplementary materials 2–6 |
